# Supplementary material
Source: publisher site journal article supplement (https://www.dovepress.com/article/289640)
Supplement: Supplementary file 1 [file get_supplementary_file.php]

Questionnaire Translated to local language for participant

**Part I: Socio-demographic, economic and child related characteristics**

| S.N | Question |  | Remark |
| --- | --- | --- | --- |
|  | Reason for health care visit | 1. Diarrhea 2. Without diarrhea |  |
|  | Age of the mother/caregiver | ……in year |  |
|  | Residence | 1. Rural 2 Urban |  |
|  | Religion | 1.Orthodox 2.Muslim 3.other specify |  |
|  | Marital status of mother/ care giver | 1.unmarried 2 Married 3.Divorced 4.Widowed |  |
|  | Educational status of mother | 1. Not able to read and write 2. able to read and write 3.Primary school  4. Secondary school 5.certificate and above |  |
|  | Current Occupation of mother | 1. Merchant 2. Farmer 3. House wife 4. Student 5. Governmental employed. 6. Privet employed 7. Others specify |  |
|  | Current Occupation of father | .1. Merchant 2. Farmer 3. Labor work 4.Student 5.Governmental employed. 6. Privet employed 7. Others specify |  |
|  | Family size | …............. |  |
|  | Sex of child | 1.Male 2.female |  |
|  | Age of child | ­­­­­­­­­­­­­­…….in month |  |
|  | Birth order | ……. |  |
|  | Number of children under 5 age | ……. |  |

| **Part .II: Health utilization and child feeding information** | | | |
| --- | --- | --- | --- |
| S.no | Question | Response | Skip |
|  | Have you attended ANC during last Child dx? | 1. Yes 2. No | If no - 18 |
|  | If yes how many times attained ANC | …………………… |  |
|  | If yes did you received child feeding information | 1. Yes 2. No | If no – 18 |
|  | If you received which information did you received(more than one answer is possible) | 1.continue breastfeed while mother or child is ill  2. initiate breastfeeding within one hour of delivery  3.avoid pre-lacteal feeding  4.EBF only for the first six months 5.continue BF until  2 year and above 6.other specify |  |
|  | Place of delivery, where did you give birth? | 1. Home 2.Hospital3.Health center 4.Health post 5. Privet clinic  6. Other |  |
|  | Mode of delivery if delivered at health facility | 1. Cs 2. SVD 3.Instrumental 4 other specify |
|  | Who assisted delivery | 1. Dr. 2. Nurse 3.medwaivery 4.HEW 5.TTBA 6. UTBA 7.family/friend |  |
|  | Have you attend PN in any Health facility? | 1, Yes 2, No | If no 26 |
|  | If yes how many times do you attained PNC | ………… |  |
|  | If ever visited by health care providers or volunteers when did you visited | 1. within one hour of delivery  2.within 2-24 hours of delivery  3.within 25-48 hours of delivery  4. after 48 hours of delivery |  |
|  | Do you get information about child feeding practice during PNC follow up | 1. Yes 2. No | If no 26 |
|  | On which of the following you received information among health care providers | 1 Growth monitoring 2 EBF  3Complementary feeding practice  4 FP 5 Child care  6 Child feeding practice during illness 7. Other specify |  |
|  | Have you ever your child follow GMP every month in community? | 1. Yes 2. No |  |
|  | If you attained GMP Do you get information about child feeding practice | 1. Yes 2. no |  |
|  | If you attained GMP did you received information on child feeding during diarrhea | 1. Yes 2. No |  |
|  | Did you attained radio/TV | 1. Yes 2. No |  |

**Part III. Questions related to child feeding practice**

|  | Have you ever breastfeed your child? | 1. Yes 2. No | If no – 12 |
| --- | --- | --- | --- |
|  | If yes, how soon after birth did you put on the breast? | 1.Within an hour 2.After one hour 3.After a day  4.Other specify |  |
|  | Did you squeeze out and throw away the first milk (colostrum) or give to child? | 1. Yes 2. No | If yes -5 |
|  | If you are not give colostrum’s what did you give to your child | 1. Water 2. Water and sugar 3.Cow milk 4. Formula milk  5. Butter 6. Not given |  |
|  | Did your baby receive anything to drink before he/she was first put to the breast within 3 days of delivery? | 1. Yes 2. No | If no –8 |
|  | If yes what type of fluid/liquid did you give | 1. Glucose water 2. Plain boiled water 3.cow milk 4.Formula milk 5.Butter 6.Other specify |  |
|  | What was the reason for giving the baby this liquid? | 1.Infant perceived unwell  2.Mother unwell  3.inadequate milk production from mother 4.Others |  |
|  | Are you still breastfed your child? | | 1.Yes 2.No |  | | --- | --- | | If yes - 3 |
|  | If you stop BF what was your child age when stop | ……….. |  |
|  | If you stop breast feeding what was the reasons | 1.BF takes too much time  2.fear of lose of beauty 3.mother unwell  4. starts contraceptive 5. child sick/weak 6. nipple problem |  |
|  | For how long did you breast feed alone your child | ………in month |  |
|  | If you never breast feed what was the reason | 1.Mother unwell 2.Infant unwell 3. Return to work 4.Breast problem 5. No enough milk 6. Other….. |  |
|  | Have you ever fed bottle to your child? | 1. Yes 2.No |  |
|  | If your answer is yes did your baby drink from a bottle between sunrise yesterday and sunrise today? | 1. Yes 2.N0 |  |
|  | Did you introduce liquids or foods (semi-solid or solid) other than breast milk to the baby? | 1. yes 2. No |  |
|  | If your answer is yes what was the age of your child | …….. |  |
|  | Why you introduced solid/semisolid food to your child | 1.right time 2.return to work 3.other specify |  |
|  | How many times did you feed your child between sunrise yesterday and sunrise today? | ………….. |  |
|  | Materials used feed your child | 1.spoon 2.cup 3 hand 4 bottle |  |
|  | How many times did you breastfeed your child between sunrise yesterday and sunrise today? | ……… |  |
|  | Did your child was sick within the last two weeks? | 1. Yes. 2.No |  |

| 22 | If yes, what type illness he/she manifested? | ……………… |  |
| --- | --- | --- | --- |
| 23 | Did your child sake treatment | 1. Yes. 2.No |  |
| 24 | If your answer is yes where Did your child sake treatment | 1.hospital 2.HC 3.privet clinic 4.herbal medicen |  |
| 25 | How much did you breastfeed your child during and after illness? compared with the usual | 1More than usual 2 Same as  3 Less than usual 4 Never gave food |  |
| 26 | What amount of fluid did you offered to your child during and after illness? compared with the usual | 1.More than usual 2.Same as usual 3.Less than usual  4. Never gaven fluid |  |
| 27 | What amount of food did you offered to your child during and after illness? compared with the usual | 1.More than usual 2.Same as usual 3.Less than usual  4. Never given food |  |

Part **IV Knowledge of mothers about child feeding practice**

|  | When did you think neonate should start BF? | ………….in hours |  |
| --- | --- | --- | --- |
|  | Until when EBF alone is enough | …………in months |  |
|  | colostrum’s (the first thick breast milk should be) | 1. Should be discarded 2.Should be given to child 3. I don’t know |  |
|  | When did you think infants should start solid/semisolid food? | …………in months |  |
|  | Until when children’s should continue BF with complimentary food | …………in years |  |
|  | How many times do you think infants should receive complementary foods per 24 hours | …………… |  |
|  | Breast milk prevents against infection and diarrhea | 1. Yes 2. No |  |
|  | BF is important for child growth and development | 1. Yes 2. No |  |
|  | What is the role of colostrums? | 1.Prevents infection 2.For child growth 3.I don’t know |  |
|  | What amount of food did you offered to your child during and after illness? Compared with the usual | 1. More than usual 2. Same as usual 3. Less than usual  4. Don’t feed |  |
|  | What amount of fluid did you offered to your child during and after illness? Compared with the usual | 1.More than usual 2. Same as usual 3. Less than usual  4. Don‟t feed |  |
|  | What amount of breast did you offered to your child during and after illness? Compared with the usual | 1.More than usual 2. Same as usual 3. Less than usual  4. Don‟t feed |  |

Part **V Maternal child feeding attitude questions**

|  | Breast feeding increase child mother bonding | Strongly agree | 1 |
| --- | --- | --- | --- |
| Agee | 2 |
| Neutral | 3 |
| Disagree | 4 |
| Strongly disagree | 5 |
|  | breast milk is the ideal food for infants | Strongly agree | 1 |
| Agee | 2 |
| Neutral | 3 |
| Disagree | 4 |
| Strongly disagree | 5 |
|  | breast feeding is less expensive than formula feeding | Strongly agree | 1 |
| Agee | 2 |
| Neutral | 3 |
| Disagree | 4 |
| Strongly disagree | 5 |
|  | It is good to increasing frequency of food for your child during and after illness | Strongly agree | 1 |
| Agee | 2 |
| Neutral | 3 |
| Disagree | 4 |
| Strongly disagree | 5 |
|  | It is good to increasing frequency of b fluid for your child during and after illness | Strongly agree | 1 |
| Agee | 2 |
| Neutral | 3 |
| Disagree | 4 |
| Strongly disagree | 5 |
|  | It is good to increasing frequency of breastfeeding for your child during and after illness | Strongly agree | 1 |
| Agee | 2 |
| Neutral | 3 |
| Disagree | 4 |
| Strongly disagree | 5 |
|  | Complementary feeding is needed to be started before six month | Strongly agree | 1 |
| Agee | 2 |
| Neutral | 3 |
| Disagree | 4 |
| Strongly disagree | 5 |

| Part VI: **Dietary Assessment using 24hr recall and child characters’**  **Now I would like to ask you about foods your child ate yesterday during the day or night, either separately or combined with other foods.** | | | | | |
| --- | --- | --- | --- | --- | --- |
| Groups | Food lists | Yes | No | Don’t remember | |
| **Group 1:**  **Grains, roots and Tubers** | Porridge, bread, rice, noodles or other foods made from grains | 1 | 0 | 98 | |
| White potatoes, white yams, manioc, cassava or any other foods made from roots | 1 | 0 | 98 | |
| Group 2:  Legumes and nuts | Any foods made from beans, peas, lentils, nuts or seeds | 1 | 0 | 98 | |
| Group 3:  Dairy products | Infant formula, such as [insert local examples] | 1 | 0 | 98 | |
| Milk, such as tinned, powdered or fresh animal milk | 1 | 0 | 98 | |
|  | Yogurt or drinking yogurt | 1 | 0 | 98 |
| Cheese or other dairy products | 1 | 0 | 98 | |
| Group5 **flush food** | Liver, kidney, heart or other organ meats | 1 | 0 | 98 | |
| Any meat, such as beef, pork, lamb, goat, chicken or duck | 1 | 0 | 98 | |
| Fresh or dried fish, shellfish or seafood | 1 | 0 | 98 | |
| Group5: Eggs | Eggs | 1 | 0 | 98 | |
| Group 6:  Vitamin A fruits  and vegetables | Pumpkin, carrots, squash or sweet potatoes that are yellow or orange inside | 1 | 0 | 98 | |
| Any dark green vegetables [insert local examples]  Ripe mangoes (fresh or dried [not green]), ripe papayas (fresh or dried), musk melon [insert other local vitamin-A-rich fruits] | 1 | 0 | 98 | |
| Group 7: Other fruits and Vegetables | Any other fruit of vegetable like Banana ,tomato ,pipers lemon, Avocado, mango, cabbage | 1 | 0 | 98 | |
| Total |  |  |  |  | |

**Part VII: Family income related questions for those who come from urban**

| N | Questions | Response | Remark |
| --- | --- | --- | --- |
|  | Owner ship of house | 1. Private 2.Kebele 3.Rented 4. Others specify |  |
|  | Main material of the dwelling floor | 1. Earth/Sand 2. Dung 3. Cement 4. Ceramic 5.Others specify |  |
|  | Main material of roof | 1. Metal/Tin 2. Wood 3. Others specify |  |
|  | Main material of the exterior walls | 1. Stone with mud 2. Wood with mud  3. Stone/brick with cement 4. Others specify |  |
|  | Number of rooms used for sleeping | ------------in number |  |
|  | Type of fuel mainly used for household cooking | 1. Electricity 2. Charcoal 3. Kerosene 4. Wood  5. Animal dung 6. Others specify |  |
|  | Type of latrine used | 1. Flush/Pour flush toilet household 2. Ventilated improved pit latrine (VIP) 3. Traditional pit latrine 4. Common latrine 5. Filed 6. Others specify |  |
|  | Do you have kitchen room? | 1. Yes 2. No |  |
|  | What is the main source of water for the house? | 1. Piped into residence 2. Common pipe water 3. Public well 4.Well/borehole with pump in  Compound 5. Rain water 6. Well/borehole without pump in compound 7.Pond/River/Stream/Dam  8. From spring 9. Others specify -- |  |
|  | A Radio | 1. Yes, 2. No |  |
|  | A Television? | 1. Yes 2. No |  |
|  | A home telephone? | 1. Yes 2. No |  |
|  | A Refrigerator? | 1. Yes 2. No |  |
|  | Bed/Cotton/sponge/spring mattress | 1. Yes 2. No |  |
|  | A Table? | 1. Yes 2. No |  |
|  | A chair? | 1. Yes 2. No |  |
|  | A Mobile phone | 1. Yes 2. No |  |
|  | A motor bicycle? | 1. Yes 2. No |  |
|  | Bajaj | 1. Yes 2. No |  |
|  | Cart | 1. Yes 2. No |  |
|  | Car | 1. Yes 2. No |  |
|  | Ox/caw | 1. Yes 2. No |  |
|  | Horse, Donkey, Mules | 1. Yes 2. No |  |
|  | Goat | 1. Yes 2. No |  |
|  | Sheep | 1. Yes 2. No |  |
|  | Hen | 1. Yes 2. No |  |
|  | Beehives | 1. Yes 2. No |  |
|  | Does any member of the family have a bank account | 1. Yes 2. No |  |

**For those who came from rural**

|  | Owner ship of the house | 1. Private 2. Others specify---- | |  |
| --- | --- | --- | --- | --- |
|  | Main material of the roof | 1. Metal/Tin 2. Wood 3. Others specify | |  |
|  | Main material of the exterior walls | 1. Stone with mud 2. Wood with mud  3. Stone/brick with cement 4. Others specify | |  |
|  | Type of fuel mainly used for household cooking | 1. Electricity 2. Charcoal 3. Kerosene  4. Wood 5. Animal dung 6. Others specify | |  |
|  | Do you have kitchen room? | 1. Yes 2. No | |  |
|  | Do you have separate rooms for animals? | 1. Yes 2. No | |  |
|  | What is the main source of water for the house? | 1. Piped into residence 2. Common pipe water 3. Public well/borehole 4. Well/borehole with pump in compound 5. Rain water 6. Well/borehole without pump in compound 7. Pond/River/Stream/Dam 8. From spring 9. Others specify | |  |
|  | A radio/tape | 1 Yes | 2 No |  |
|  | Abed/Cotton/sponge/spring mattress | 1 Yes | 2 No |  |
|  | A mobile phone | 1 Yes | 2 No |  |
|  | A water pump | 1 Yes | 2 No |  |
|  | A solar energy | 1 Yes | 2 No |  |
|  | Ox/cow | 1 Yes | 2 No |  |
|  | Calf | 1 Yes | 2 No |  |
|  | Horse/mules | 1 Yes | 2 No |  |
|  | Donkey | 1 Yes | 2 No |  |
|  | Sheep/goat | 1 Yes | 2 No |  |
|  | Hen | 1 Yes | 2 No |  |
|  | Beehives | 1 Yes | 2 No |  |
|  | Teff | 1 Yes | 2 No |  |
|  | Barley | 1 Yes | 2 No |  |
|  | Wheat | 1 Yes | 2 No |  |
|  | Maize | 1 Yes | 2 No |  |
|  | Sorghum | 1 Yes | 2 No |  |
|  | Oats | 1 Yes | 2 No |  |
|  | Bean | 1 Yes | 2 No |  |
|  | Pea | 1 Yes | 2 No |  |
|  | Chickpea | 1 Yes | 2 No |  |
|  | Lentil |  | 2 No |  |
|  | Carrot | 1 Yes | 2 No |  |
|  | Onion | 1 Yes | 2 No |  |
|  | Garlic | 1 Yes | 2 No |  |
|  | Potato | 1 Yes | 2 No |  |
|  | Cabbage | 1 Yes | 2 No |  |
|  | Tomato | 1 Yes | 2 No |  |
|  | Others (specify) ----- |  |  |  |
